# Supplementary material for: Augmented Oral Bioavailability and Prokinetic Activity of Levosulpiride Delivered in Nanostructured Lipid Carriers
Source: MDPI journal article supplement (doi:10.3390/pharmaceutics14112347), 2022-10-31
Supplement: s1 [file s1]

**Supplementary Table S1.** Solubility of LSP in melted solid lipids and liquid lipids heated at 75°C evaluated in terms of solution transparency (soluble) or turbidity (insoluble).

|                      | <b>Lipid</b>          | <b>LSP amount</b> |              |
|----------------------|-----------------------|-------------------|--------------|
|                      |                       | <b>25 mg</b>      | <b>50 mg</b> |
| <b>Solid lipids</b>  | Precirol® ATO5        | transparent       | transparent  |
|                      | Cetyl alcohol         | transparent       | turbid       |
|                      | Glyceryl monostearate | turbid            | turbid       |
| <b>Liquid lipids</b> | Labrasol®             | transparent       | transparent  |
|                      | Oleic acid            | turbid            | turbid       |
|                      | Soybean oil           | transparent       | turbid       |

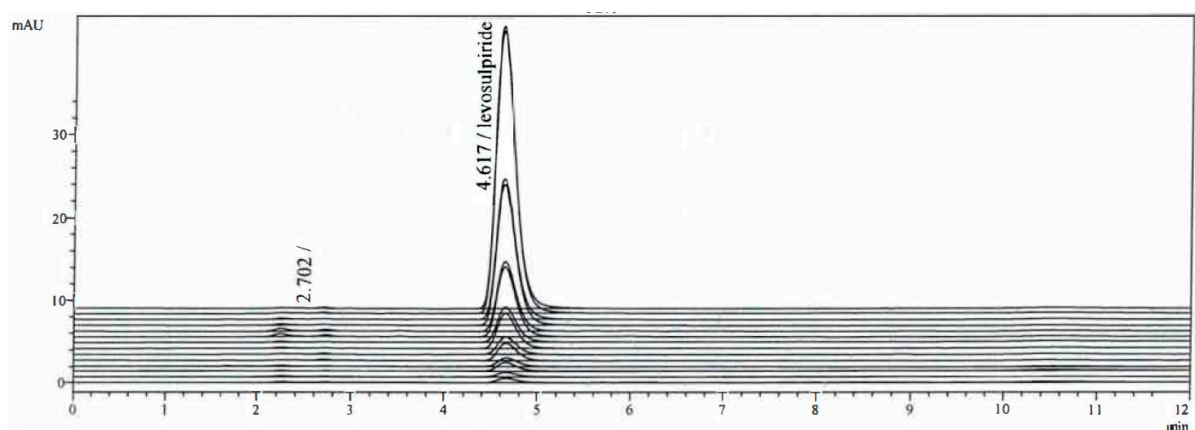

**Supplementary Figure S1.** HPLC chromatograms of different concentrations of LSP in mobile phase.
